# Supplementary material
Source: PubMed Central journal article supplement (PMC2657413)
Supplement: 0811744106_0811744106SI.pdf [file 0811744106_0811744106SI.pdf]

# Supporting Information

Lee et al. 10.1073/pnas.0811744106

MFSSSSAMTGKRAESWSRLLLLLWLYRCARGLLVLS 35

SSLDRDKLQLKATKQGSRNRFLLHILWRCIVVMIYA 70

GLWPMLTSAVIGKRLESYADVLLALAQSMSVSILAV 105

ISFVIQARGENQFREVLNRYLALYQORICLTTRLRH 140

LFPTKFVVFLLKLFFTLCGCFHEIIPLFENSHFD 175

DISQMVGTGFGIYMWLGTLCVLDACFLGFLVSGIL 210

YEHMANNIIAMLRMEPIESQDERYRMTKYRRMQL 245

LCDFADELDECAAIYSELYHVTNSFRRILQWQILF 280

YIYLNFINICLMLYQYILHFLNDDEVVVFVSIVMAF 315

VKLANLVLLMMCADYTVRQSEVPKKLPLDIVCSDM 350

DERWDKSVETFLGQLQTORLEIKVLGFFHLNNEFI 385

LLILSAIISYLFILIQFGITGGFEASEDIKNRFD 419

**Fig. S1.** Deduced amino acid sequence of Gr93a. The signal peptide at the N terminus (box) and the 7 predicted transmembrane segments (Upper lines) are indicated.

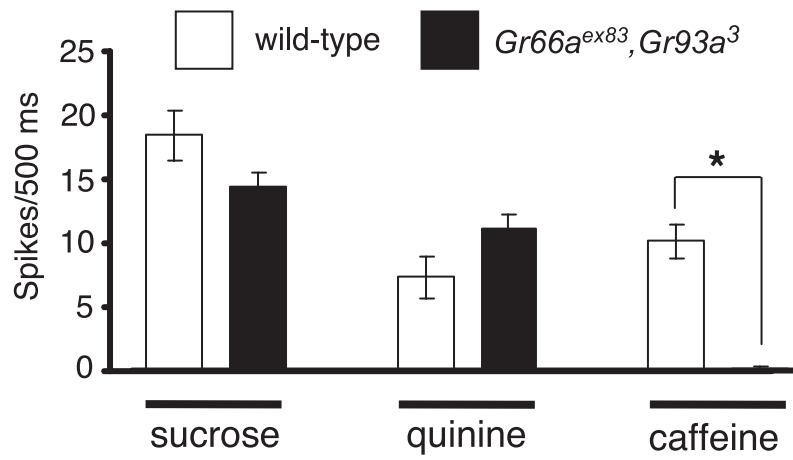

**Fig. S2.** The *Gr66a<sup>ex83</sup>, Gr93a<sup>3</sup>* double-mutant animals show responses to sucrose and quinine, but not caffeine, similar to the *Gr66a<sup>ex83</sup>* or *Gr93a<sup>3</sup>* single-mutant animals. Shown are the average action potentials (spikes/500 ms) produced in S6 sensilla after application of 50-mM sucrose, 1-mM quinine, or 10-mM caffeine. The error bars represent SEMs. The asterisk indicates a statistically significant difference from wild type ( $P < 0.0003$ ).

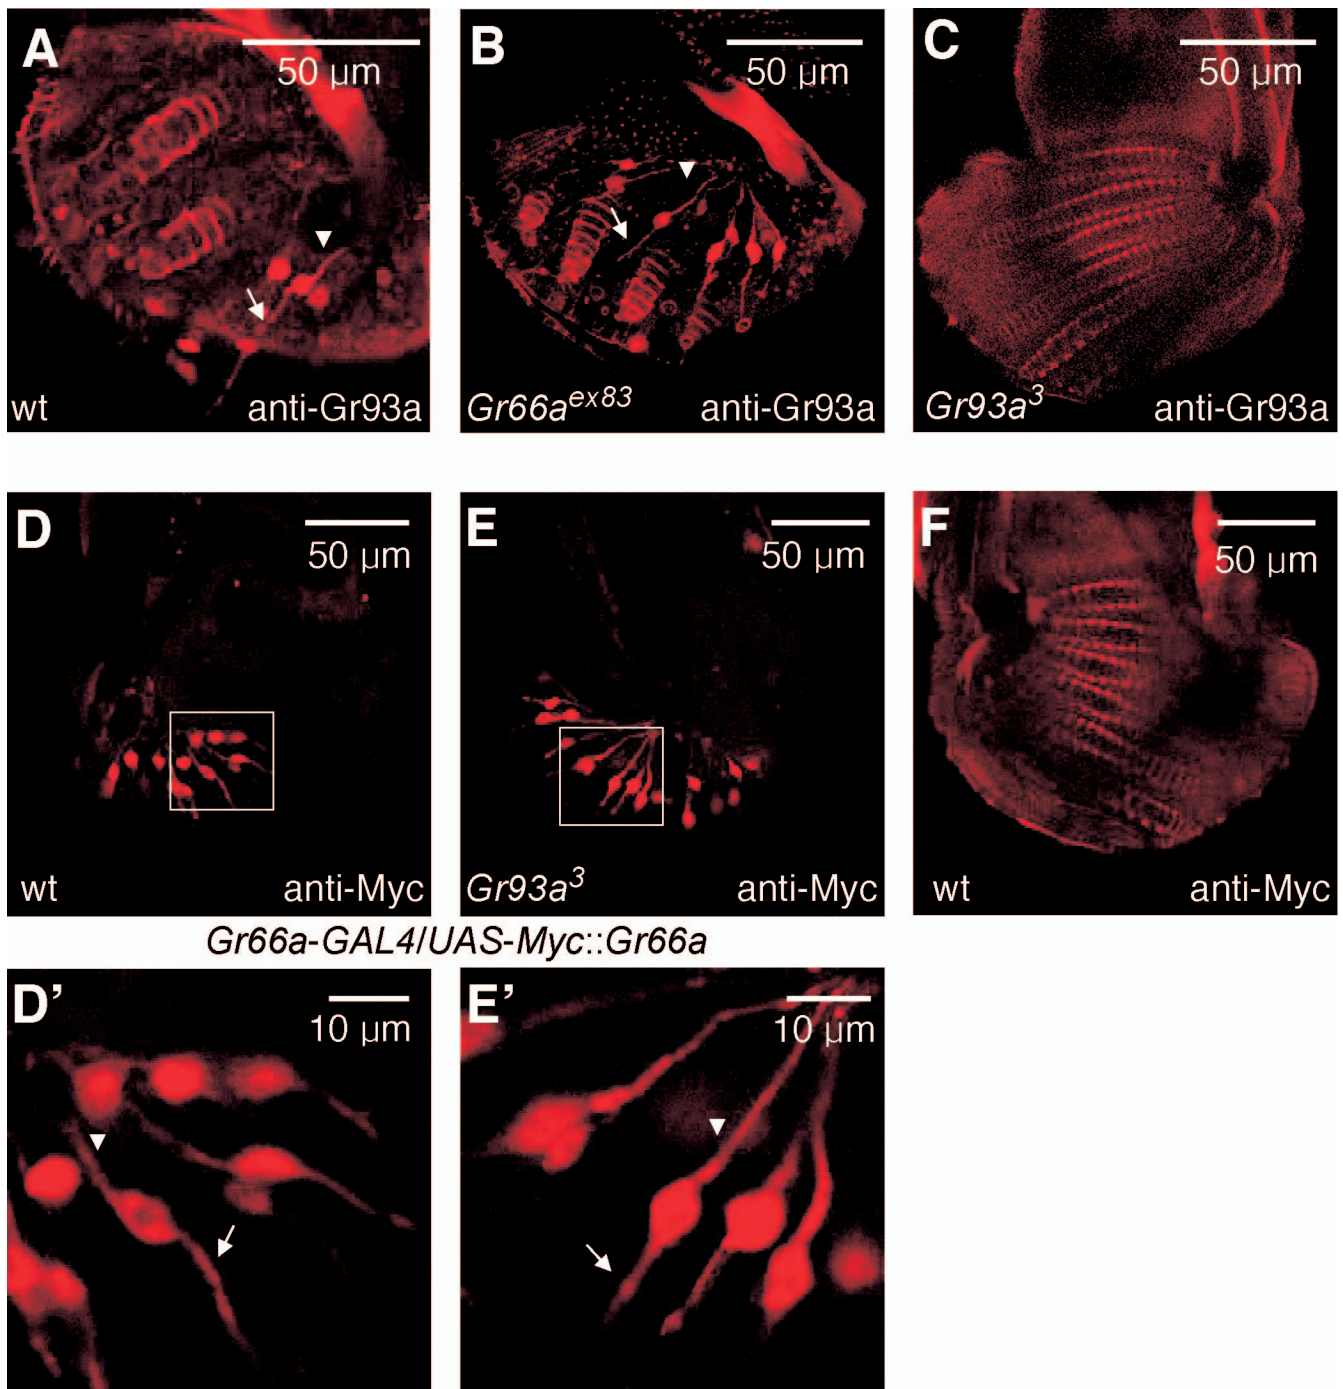

**Fig. S3.** Normal subcellular localization of the Gr93a and Gr66a proteins in the *Gr66a* and *Gr93a* mutant backgrounds. Shown are fluorescent images of labelia viewed by confocal microscopy. (A–C) Anti-Gr93a staining in (A) wild-type, (B) *Gr66a<sup>ex83</sup>*, and (C) *Gr93a<sup>3</sup>*. (D–F) Anti-Myc staining in (D) wild-type flies containing the *Gr66a-GAL4/UAS-Myc::Gr66a* transgenes, (E) *Gr93a<sup>3</sup>* flies containing the *Gr66a-GAL4/UAS-Myc::Gr66a* transgenes, and (F) wild-type. (D') and (E') are magnifications of the regions indicated by the boxes in (D) and (E) respectively. The proteins were expressed in dendrites (arrows), axons (arrowheads), and cell bodies.

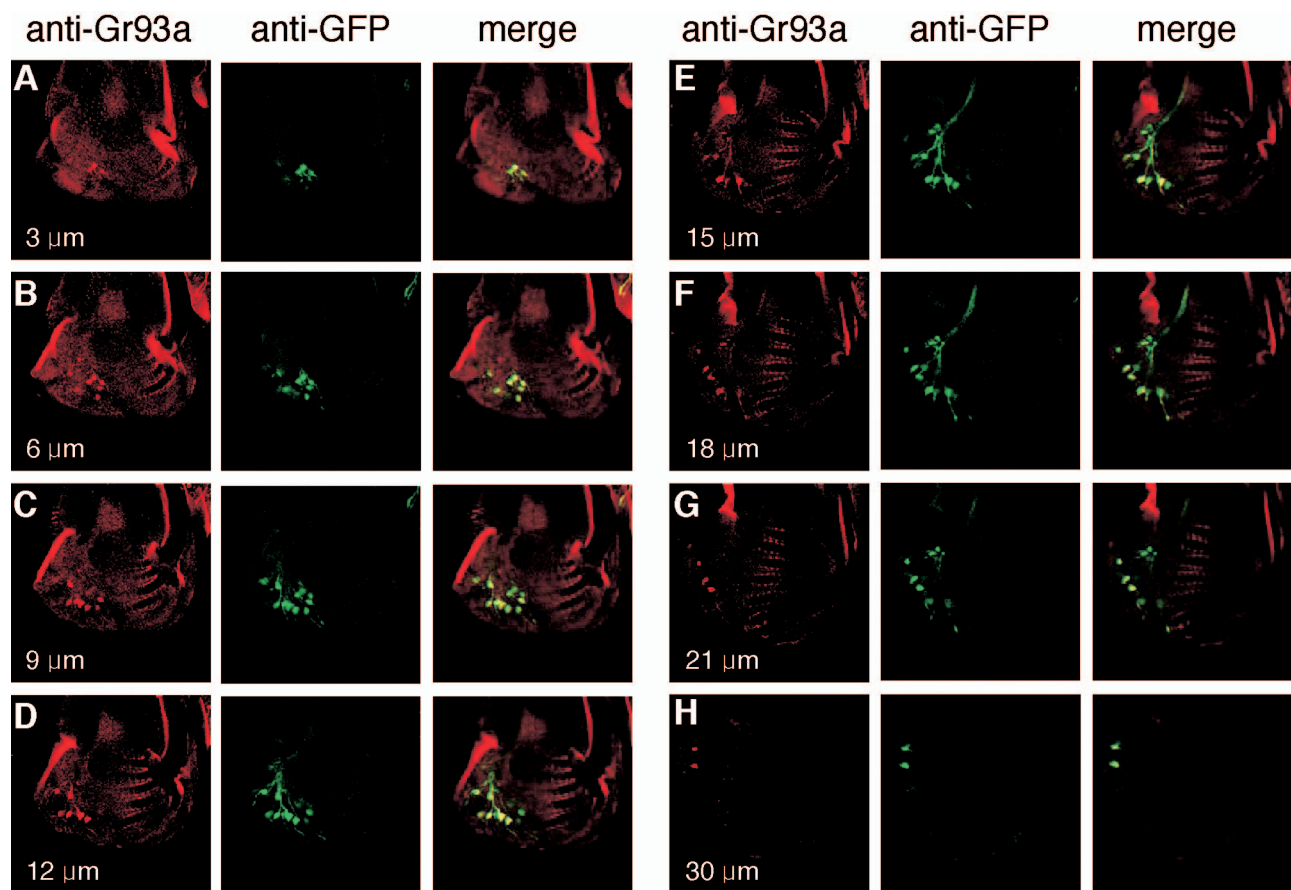

**Fig. S4.** The Gr93a protein and the Gr66a reporter were coexpressed in 22 GRNs in wild-type labella. (A–H) The GFP was expressed using the *UAS-mCD8::GFP* and the *Gr66a-GAL4* transgenes. The anti-Gr93a and anti-GFP were fluorescently stained red and green, respectively. Shown are confocal stacks at the indicated intervals.

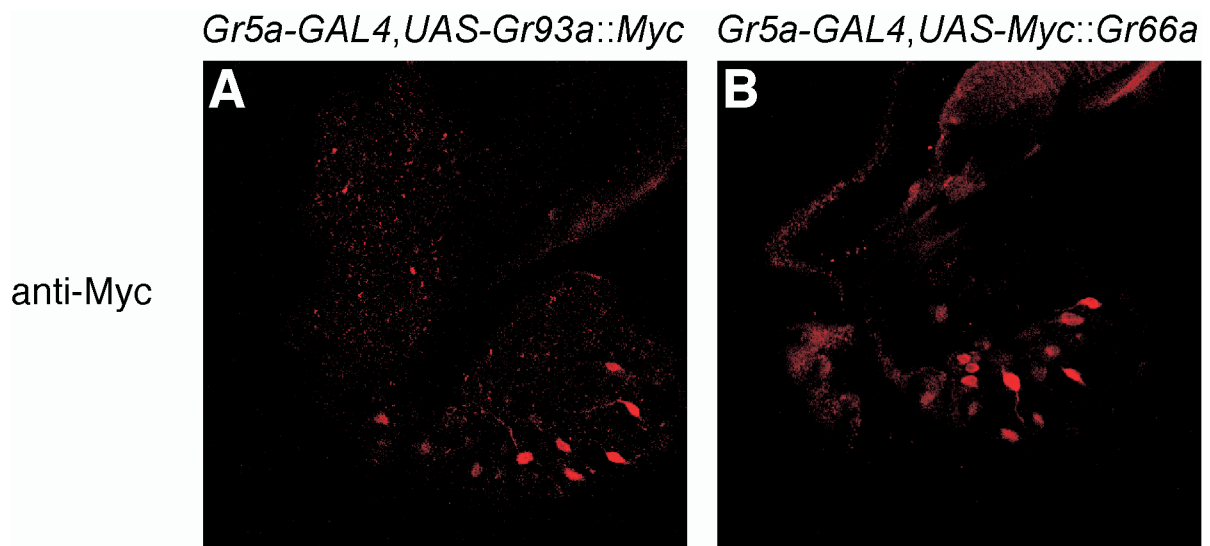

**Fig. S5.** The *Gr93a::Myc* and *Myc::Gr66a* proteins were misexpressed in *Gr5a* GRNs. The immunofluorescent stainings of labella were viewed by confocal microscopy. The *Gr5a* GRNs expressed the following transgenes under the control of the *Gr5a-GAL4*: (A) *UAS-Gr93a::Myc*, and (B) *UAS-Myc::Gr66a*.

*Gr5a-GAL4/UAS-Gr93a::Myc,UAS-Myc::Gr66a/+*

S-type

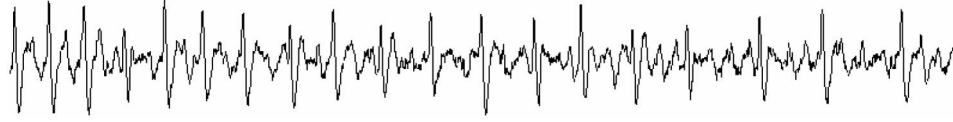

L-type

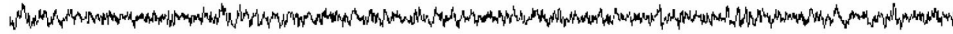

1 mV  
50 ms

**Fig. S6.** Caffeine did not induce action potentials in GRNs in L-type sensilla, which misexpress Gr93a and Gr66a. In wild-type animals, presentation of caffeine produces action potentials in S-type but not L-type sensilla. Shown are tip recordings obtained from transgenic animals misexpressing *UAS-Gr93a::Myc* and *UAS-Myc::Gr66a* in L-type sensilla under control of the *Gr5a-GAL4*. The 10-mM caffeine did not elicit a response in the transgenic L-type L2, L4, and L6 sensilla, but showed normal action potentials in S-type (S6) sensilla.

Table S1. Statistics for the data in Fig. 2A

| Sugars               | Wild-type                 | <i>Gr93<sup>3</sup></i>   | <i>P</i> values |
|----------------------|---------------------------|---------------------------|-----------------|
|                      | PI                        | PI                        |                 |
| Maltose              | <sup>1</sup> 1.00 ± 0.002 | <sup>2</sup> 1.00 ± 0.003 | 0.53            |
| Trehalose            | 0.95 ± 0.01               | 0.95 ± 0.01               | 0.93            |
| Fructose             | 0.99 ± 0.01               | 0.99 ± 0.01               | 0.80            |
| Glucose              | 0.93 ± 0.02               | 0.94 ± 0.01               | 0.49            |
| Sucrose              | 0.99 ± 0.01               | 0.98 ± 0.01               | 0.80            |
| Sucrose (dye switch) | 0.99 ± 0.01               | 0.99 ± 0.01               | 0.32            |

The mean PIs are listed.  $n \geq 4$  (40–70 flies per experiment) for the behavioral assays. The *P* values are relative to wild type and are based on the unpaired Student *t*-test. <sup>1</sup>0.998. <sup>2</sup>0.995.

**Table S2. Statistics for the data shown in Fig. 2B**

| Tastants     | Wild-type    | <i>Gr93<sup>3</sup></i> |                        |
|--------------|--------------|-------------------------|------------------------|
|              | PI           | PI                      | <i>P</i> values        |
| Sucrose only | 0.09 ± 0.02  | 0.08 ± 0.03             | 0.82                   |
| Quinine      | 0.91 ± 0.06  | 0.98 ± 0.02             | 0.13                   |
| Strychnine   | 0.96 ± 0.01  | 0.96 ± 0.02             | 0.97                   |
| Berberine    | 0.93 ± 0.03  | 0.92 ± 0.02             | 0.80                   |
| Denatonium   | 0.98 ± 0.002 | 0.99 ± 0.01             | 0.78                   |
| Lobeline     | 0.98 ± 0.01  | 0.96 ± 0.02             | 0.34                   |
| Papaverine   | 0.95 ± 0.02  | 0.92 ± 0.05             | 0.51                   |
| Caffeine     | 0.97 ± 0.02  | 0.41 ± 0.05             | 1.4 × 10 <sup>-7</sup> |

The mean PIs are listed.  $n \geq 4$  (40–70 flies per experiment) for the behavioral assays. The *P* values are relative to wild type and are based on the unpaired Student *t*-test.



**Table S3. Statistics for the data shown in Fig. 2C**

| Caffeine-dye  | wild-type   | <i>Gr93<sup>3</sup></i> |                        |
|---------------|-------------|-------------------------|------------------------|
|               | PI          | PI                      | <i>P</i> values        |
| Caffeine-red  | 0.92 ± 0.04 | 0.37 ± 0.04             | 7.5 × 10 <sup>-5</sup> |
| Caffeine-blue | 0.92 ± 0.02 | 0.31 ± 0.05             | 2.0 × 10 <sup>-5</sup> |

The mean PIs are listed.  $n \geq 4$  (40–70 flies per experiment) for the behavioral assays. The *P* values are relative to wild type and are based on the unpaired Student *t*-test.

**Table S4. Additional statistics for the data shown in Fig. 2C**

| Values          | Wild-type   | <i>Gr93<sup>1</sup></i> | <i>Gr93<sup>1</sup>/Gr93<sup>2</sup></i> | <i>Gr93<sup>2</sup>/+</i> |
|-----------------|-------------|-------------------------|------------------------------------------|---------------------------|
| PI              | 0.97 ± 0.02 | 0.43 ± 0.04             | 0.56 ± 0.04                              | 0.99 ± 0.004              |
| <i>P</i> values |             | 5.9 × 10 <sup>-9</sup>  | 3.9 × 10 <sup>-7</sup>                   | 0.23                      |

**Table S5. Statistics for the data in Fig. 3**

| Compounds  | Wild-type     | <i>Gr93<sup>3</sup></i> |                        |
|------------|---------------|-------------------------|------------------------|
|            | Spikes/500 ms | Spikes/500 ms           | <i>P</i> values        |
| Sucrose    | 13.6 ± 2.13   | 15.0 ± 2.10             | 0.69                   |
| Quinine    | 10.1 ± 0.98   | 11.1 ± 0.97             | 0.49                   |
| Strychnine | 14.5 ± 1.09   | 11.9 ± 0.69             | <sup>1</sup> 0.05      |
| Berberine  | 19.0 ± 3.04   | 17.6 ± 3.09             | 0.75                   |
| Denatonium | 13.5 ± 1.81   | 15.3 ± 1.49             | 0.47                   |
| Lobeline   | 15.4 ± 1.90   | 13.8 ± 1.45             | 0.51                   |
| Papaverine | 20.2 ± 4.42   | 20.2 ± 4.30             | 1.00                   |
| Caffeine   | 13.8 ± 1.60   | 1.2 ± 0.64              | 1.4 × 10 <sup>-6</sup> |

The mean spike frequencies (±SEMs) are listed.  $n \geq 6$  for the tip recordings. The *P* values are relative to wild type and are based on the unpaired Student *t*-test. <sup>1</sup>0.054.

**Table S6. Statistics for the data shown in Fig. 5A**

| Genotype                                          | PI          | <i>P</i> values |
|---------------------------------------------------|-------------|-----------------|
| wild-type                                         | 0.97 ± 0.02 |                 |
| <i>UAS-Gr93a::Myc;Gr93<sup>3</sup></i>            | 0.37 ± 0.04 |                 |
| <i>Gr66a-GAL4;Gr93<sup>3</sup></i>                | 0.46 ± 0.06 |                 |
| <i>Gr66a-GAL4/UAS-Gr93a::Myc;Gr93<sup>3</sup></i> | 0.83 ± 0.05 | ≤0.0022         |

The mean PIs (±SEMs) are listed.  $n \geq 4$  (40–70 flies per experiment) for the behavioral assays. The *P* values are relative to *UAS-Gr93a::Myc;Gr93<sup>3</sup>* and *Gr66a-GAL4;Gr93<sup>3</sup>* and are based on the unpaired Student *t*-test.

**Table S7. Statistics for the data shown in Fig. 5B**

| Genotype                                          | Spikes/500 ms | <i>P</i> values         |
|---------------------------------------------------|---------------|-------------------------|
| Wild-type                                         | 13.8 ± 1.60   |                         |
| <i>UAS-Gr93a::Myc;Gr93<sup>3</sup></i>            | 0.33 ± 0.33   |                         |
| <i>Gr66a-GAL4;Gr93<sup>3</sup></i>                | 0.00 ± 0.00   |                         |
| <i>Gr66a-GAL4/UAS-Gr93a::Myc;Gr93<sup>3</sup></i> | 13.0 ± 1.46   | ≤1.1 × 10 <sup>-4</sup> |

The mean PIs and spike frequencies (±SEMs) are listed in each table.  $n \geq 6$  for the tip recordings. The *P* values are relative to *UAS-Gr93a::Myc;Gr93<sup>3</sup>* and *Gr66a-GAL4;Gr93<sup>3</sup>* and are based on the unpaired Student *t*-test.

**Table S8. Statistics for the data shown in Fig. 6A**

| Methylxanthine |                 | Wild-type   | <i>Gr93<sup>3</sup></i>  | <i>Gr66a<sup>ex83</sup></i> |
|----------------|-----------------|-------------|--------------------------|-----------------------------|
| Caffeine       | PI              | 0.82 ± 0.06 | 0.35 ± 0.03              | 0.52 ± 0.01                 |
|                | <i>P</i> values |             | 6.5 × 10 <sup>-5</sup>   | 0.0024                      |
| Theophylline   | PI              | 0.81 ± 0.03 | 0.48 ± 0.06              | 0.67 ± 0.02                 |
|                | <i>P</i> values |             | 0.0027                   | 0.0043                      |
| Theobromine    | PI              | 0.89 ± 0.03 | 0.96 ± 0.02              | 0.94 ± 0.03                 |
|                | <i>P</i> values |             | 0.12                     | 0.27                        |
| Paraxanthine   | PI              | 0.95 ± 0.04 | <sup>1</sup> 1.00 ± 0.00 | 0.97 ± 0.01                 |
|                | <i>P</i> values |             | 0.23                     | 0.56                        |

The mean PIs (±SEMs) are listed.  $n \geq 4$  (40–70 flies per experiment) for the behavioral assays. The *P* values are relative to wild-type unless specified otherwise and are based on the unpaired Student *t*-test. <sup>1</sup>0.996 ± 0.004

**Table S9. Statistics for the data shown in Fig. 6B**

| Methylxanthine |                 | Wild-type   | <i>Gr93<sup>3</sup></i> | <i>Gr66a<sup>ex83</sup></i> |
|----------------|-----------------|-------------|-------------------------|-----------------------------|
| Caffeine       | Spikes/500 ms   | 13.8 ± 1.60 | 1.2 ± 0.64              | 0.6 ± 0.42                  |
|                | <i>P</i> values |             | 1.4 × 10 <sup>-6</sup>  | 9.8 × 10 <sup>-7</sup>      |
| Theophylline   | Spikes/500 ms   | 17.4 ± 3.74 | 0.6 ± 0.38              | 0.6 ± 0.32                  |
|                | <i>P</i> values |             | 6.2 × 10 <sup>-4</sup>  | 6.1 × 10 <sup>-4</sup>      |
| Theobromine    | Spikes/500 ms   | 17.4 ± 4.42 | 15.3 ± 4.43             | 19.2 ± 2.63                 |
|                | <i>P</i> values |             | 0.75                    | 0.76                        |
| Paraxanthine   | Spikes/500 ms   | 10.9 ± 1.18 | 14.5 ± 1.83             | 15.4 ± 2.13                 |
|                | <i>P</i> values |             | 0.13                    | 0.070                       |

The mean spike frequencies (±SEMs). *n* ≥ 6 for the tip recordings. The *P* values are relative to wild-type unless specified otherwise and are based on the unpaired Student *t*-test.
